# Supplementary material
Source: MDPI journal article supplement (https://www.mdpi.com/2071-1050/10/1/143)
Supplement: s1 [file s1]

## Supplementary for Managing Sustainable Use of Antibiotics

**Table S1.** Logistic probability model of willingness to abstain antibiotics

| Model 0        | B       | SE  | Wald's Z | Sig. | Exp(B) |
|----------------|---------|-----|----------|------|--------|
| Intercept      | -.20    | .06 | 12.43    | .00  | .82    |
| N              | 1293    |     |          |      |        |
| -2 LL          | 1779.99 |     |          |      |        |
| Classification | 54.9%   |     |          |      |        |

Notes: Method=enter, Variables entered: "Are you willing to abstain from using antibiotics, if possible, even when you risk additional sick days?" The options are, 1 = no, absolutely not, 2 = no, most likely not, 3 = yes, most likely, and 4 = yes, absolutely, and is dichotomized to 1 = yes, absolutely and 0 = other. Interpersonal trust was posed as "to what extent can you say that other people can be trusted?" Where 0 = one cannot trust other people and 10 = you can trust other people. Source: The national SOM survey 2016

**Table S2.** Logistic probability model of willingness to abstain antibiotics after interpersonal trust, antibiotics use, self-estimated health, worry about increased resistance, level of education, institutional trust, gender, and age

| Model 1                     | B        | SE  | Wald's Z | Sig. | 95% CI<br>Lower | Exp (B) | 95% CI<br>Upper |
|-----------------------------|----------|-----|----------|------|-----------------|---------|-----------------|
| Interpersonal trust         | .10      | .03 | 15.65    | .00  | 1.05            | 1.11    | 1.16            |
| Intercept                   | -.87     | .18 | 23.37    | .00  |                 | .42     |                 |
| N                           | 1293     |     |          |      |                 |         |                 |
| -2 LL                       | 1763.94  |     |          |      |                 |         |                 |
| Nagelkerke's R <sup>2</sup> | .016     |     |          |      |                 |         |                 |
| Model Chi <sup>2</sup>      | 16.05*** |     |          |      |                 |         |                 |
| Hosmer & Lemeshow           | 8.25     |     |          |      |                 |         |                 |
| Classification              | 57.3%    |     |          |      |                 |         |                 |

Notes: Method=enter, Variables entered: "Are you willing to abstain from using antibiotics, if possible, even when you risk additional sick days?" The options are, 1 = no, absolutely not, 2 = no, most likely not, 3 = yes, most likely, and 4 = yes, absolutely, and is dichotomized to 1 = yes, absolutely and 0 = other. Interpersonal trust was posed as "to what extent can you say that other people can be trusted?" Where 0 = one cannot trust other people and 10 = you can trust other people. Source: The national SOM survey 2016

**Table S3.** Logistic probability model of willingness to abstain antibiotics after interpersonal trust, antibiotics use, self-estimated health, worry about increased resistance

| Model 2                     | B         | SE  | Wald's Z | Sig. | 95% CI<br>Lower | Exp(B) | 95% CI<br>Upper |
|-----------------------------|-----------|-----|----------|------|-----------------|--------|-----------------|
| Interpersonal trust         | .08       | .03 | 7.99     | .01  | 1.02            | 1.08   | 1.14            |
| Antibiotics use (1)         |           |     | 9.99     | .02  |                 |        |                 |
| 2-5 times (2)               | .39       | .38 | 1.06     | .30  | .70             | 1.48   | 3.14            |
| Once (3)                    | .18       | .35 | .27      | .60  | .61             | 1.20   | 2.38            |
| Never (4)                   | .59       | .33 | 3.09     | .08  | .94             | 1.80   | 3.45            |
| Worry low (1)               |           |     | 65.62    | .00  |                 |        |                 |
| Worry (2)                   | -.03      | .57 | .00      | .96  | .32             | .97    | 2.95            |
| Worry (3)                   | .66       | .54 | 1.50     | .22  | .68             | 1.93   | 5.51            |
| Worry high (4)              | 1.39      | .53 | 6.81     | .01  | 1.41            | 4.02   | 11.44           |
| Health (well)               | .36       | .14 | 6.3      | .01  | 1.08            | 1.43   | 1.90            |
| Intercept                   | -2.41     | .66 | 13.49    | .00  |                 | .09    |                 |
| N                           | 1293      |     |          |      |                 |        |                 |
| -2 LL                       | 1674.07   |     |          |      |                 |        |                 |
| Nagelkerke's R <sup>2</sup> | .105      |     |          |      |                 |        |                 |
| Model Chi <sup>2</sup>      | 105.92*** |     |          |      |                 |        |                 |
| Hosmer & Lemeshow           | 13.61*    |     |          |      |                 |        |                 |
| Classification              | 62.1%     |     |          |      |                 |        |                 |

Notes: Method=enter, Variables entered: "Are you willing to abstain from using antibiotics, if possible, even when you risk additional sick days?" The options are, 1 = no, absolutely not, 2 = no, most likely not, 3 = yes, most likely, and 4 = yes, absolutely, and is dichotomized to 1 = yes, absolutely and 0 = other. Interpersonal trust was posed as "to what extent can you say that other people can be trusted?" Where 0 = one cannot trust other people and 10 = you can trust other people. Source: The national SOM survey 2016

**Table S4.** Logistic probability model of willingness to abstain antibiotics after interpersonal trust, antibiotics use, self-estimated health, worry about increased resistance, level of education and institutional trust.

| Model 3                     | B         | SE  | Wald's Z | Sig | 95% CI<br>Lower | Exp(B) | 95% CI<br>Upper |
|-----------------------------|-----------|-----|----------|-----|-----------------|--------|-----------------|
| Interpersonal trust         | .06       | .03 | 4.52     | .03 | 1.01            | 1.06   | 1.12            |
| Antibiotics use (1)         |           |     | 8.73     | .03 |                 |        |                 |
| 2-5 times (2)               | .30       | .39 | .60      | .44 | .63             | 1.35   | 2.88            |
| Once (3)                    | .12       | .35 | .12      | .73 | .57             | 1.13   | 2.56            |
| Never (4)                   | .51       | .34 | 2.29     | .13 | .86             | 1.66   | 3.23            |
| Worry low (1)               |           |     | 63.03    | .00 |                 |        |                 |
| Worry (2)                   | -.08      | .57 | .02      | .88 | .30             | .92    | 2.82            |
| Worry (3)                   | .58       | .54 | 1.15     | .29 | .62             | 1.78   | 5.15            |
| Worry high (4)              | 1.32      | .54 | 6.00     | .01 | 1.30            | 3.74   | 10.73           |
| Health (well)               | .29       | .15 | 3.78     | .05 | 1.00            | 1.33   | 1.77            |
| Education low (1)           |           |     | 18.58    | .00 |                 |        |                 |
| Education (2)               | .63       | .22 | 7.93     | .01 | 1.21            | 1.87   | 2.89            |
| Education (3)               | .88       | .23 | 15.31    | .00 | 1.55            | 2.42   | 3.77            |
| Education high (4)          | .88       | .22 | 15.65    | .00 | 1.55            | 2.39   | 3.69            |
| Institutional trust (1)     |           |     | .60      | .90 |                 |        |                 |
| Institutional trust (2)     | -.01      | .35 | .00      | .98 | .50             | .99    | 1.97            |
| Institutional trust (3)     | .04       | .34 | .01      | .91 | .53             | 1.04   | 2.03            |
| Institutional trust (4)     | .15       | .37 | .15      | .69 | .56             | 1.16   | 2.38            |
| Intercept                   | -2.85     | .73 | 15.23    | .00 |                 | .06    |                 |
| Cases                       | 1293      |     |          |     |                 |        |                 |
| -2 LL                       | 1653.84   |     |          |     |                 |        |                 |
| Nagelkerke's R <sup>2</sup> | .124      |     |          |     |                 |        |                 |
| Model Chi <sup>2</sup>      | 126.14*** |     |          |     |                 |        |                 |
| Hosmer & Lemeshow           | 6.18      |     |          |     |                 |        |                 |
| Classification              | 63.9%     |     |          |     |                 |        |                 |

Notes: Method=enter, Variables entered: "Are you willing to abstain from using antibiotics, if possible, even when you risk additional sick days?" The options are, 1 = no, absolutely not, 2 = no, most likely not, 3 = yes, most likely, and 4 = yes, absolutely, and is dichotomized to 1 = yes, absolutely and 0 = other. Interpersonal trust was posed as "to what extent can you say that other people can be trusted?" Where 0 = one cannot trust other people and 10 = you can trust other people. Source: The national SOM survey 2016

**Table S5.** Logistic probability model of willingness to abstain antibiotics after interpersonal trust, antibiotics use, self-estimated health, worry about increased resistance, level of education, institutional trust, gender and age

| <b>Model 4</b>              | <b>B</b>  | <b>SE</b> | <b>Wald's Z</b> | <b>Sig.</b> | <b>95% CI<br/>Lower</b> | <b>Exp(B)</b> | <b>95% CI<br/>Upper</b> |
|-----------------------------|-----------|-----------|-----------------|-------------|-------------------------|---------------|-------------------------|
| Interpersonal trust         | .07       | .03       | 5.68            | .02         | .01                     | 1.07          | 1.13                    |
| Antibiotics use (1)         |           |           | 7.98            | .05         |                         |               |                         |
| 2-5 times (2)               | .31       | .39       | .63             | .43         | .64                     | 1.36          | 2.92                    |
| Once (3)                    | .06       | .36       | .03             | .87         | .53                     | 1.06          | 2.12                    |
| Never (4)                   | .45       | .34       | 1.72            | .19         | .80                     | 1.56          | 3.04                    |
| Worry low (1)               |           |           | 69.19           | .00         |                         |               |                         |
| Worry (2)                   | .01       | .58       | .00             | .99         | .33                     | 1.01          | 3.11                    |
| Worry (3)                   | .69       | .55       | 1.58            | .21         | .68                     | 1.99          | 5.80                    |
| Worry high (4)              | 1.48      | .55       | 7.40            | .01         | 1.51                    | 4.40          | 12.81                   |
| Health (well)               | .25       | .15       | 2.73            | .10         | .96                     | 1.28          | 1.71                    |
| Education low (1)           |           |           | 9.45            | .02         |                         |               |                         |
| Education (2)               | .42       | .23       | 3.33            | .07         | .97                     | 1.53          | 2.41                    |
| Education (3)               | .67       | .24       | 7.93            | .01         | 1.23                    | 1.95          | 3.10                    |
| Education high (4)          | .62       | .23       | 7.07            | .01         | 1.18                    | 1.86          | 2.95                    |
| Institutional trust (1)     |           |           | 1.07            | .78         |                         |               |                         |
| Institutional trust (2)     | .00       | .35       | .00             | 1.00        | .50                     | 1.00          | 2.00                    |
| Institutional trust (3)     | .10       | .35       | .08             | .78         | .56                     | 1.10          | 2.17                    |
| Institutional trust (4)     | .21       | .37       | .32             | .57         | .59                     | 1.24          | 2.57                    |
| Gender (f)                  | -.06      | .12       | .27             | .61         | .74                     | .94           | 1.19                    |
| Age (1)                     |           |           | 12.69           | .01         |                         |               |                         |
| 30-49 years (2)             | .13       | .21       | .40             | .53         | .76                     | 1.14          | 1.73                    |
| 50-64 years (3)             | -.05      | .21       | .05             | .82         | .63                     | .95           | 1.43                    |
| 65-85 years (4)             | -.45      | .22       | 4.25            | .04         | .41                     | .64           | .98                     |
| Intercept                   | -2.67     | .76       | 12.20           | .00         |                         | .07           |                         |
| N                           | 1293      |           |                 |             |                         |               |                         |
| -2 LL                       | 1640.79   |           |                 |             |                         |               |                         |
| Nagelkerke's R <sup>2</sup> | .137      |           |                 |             |                         |               |                         |
| Model Chi <sup>2</sup>      | 139.20*** |           |                 |             |                         |               |                         |
| Hosmer & Lemeshow           | 4.36      |           |                 |             |                         |               |                         |
| Classification              | 63.9%     |           |                 |             |                         |               |                         |

Notes: Method=enter, Variables entered: "Are you willing to abstain from using antibiotics, if possible, even when you risk additional sick days?" The options are, 1 = no, absolutely not, 2 = no, most likely not, 3 = yes, most likely, and 4 = yes, absolutely, and is dichotomized to 1 = yes, absolutely and 0 = other. Interpersonal trust was posed as "to what extent can you say that other people can be trusted?" Where 0 = one cannot trust other people and 10 = you can trust other people. Source: The national SOM survey 2016

## Randomization checks

**Table S6.** Descriptive statistics of sex by experiment groups

Sex

| Group          | N    | Mean | Std. dev | Std. err | 95 % CI lower | 95 % CI Upper |
|----------------|------|------|----------|----------|---------------|---------------|
| 80 % cooperate | 878  | .36  | .48      | .02      | .33           | .39           |
| 20 % cooperate | 938  | .36  | .48      | .02      | .33           | .39           |
| Information    | 864  | .36  | .48      | .02      | .33           | .39           |
| Control        | 879  | .38  | .49      | .02      | .34           | .41           |
| Total          | 3559 | .36  | .48      | .01      | .35           | .38           |

Source: The Citizen Panel 26 2017

**Table S7.** ANOVA of sex by experiment groups

Sex

| Group          | Sum of Squares | df   | Mean Square | F   | Sig. |
|----------------|----------------|------|-------------|-----|------|
| Between groups | .22            | 3    | .07         | .32 | .81  |
| Within groups  | 822.75         | 3555 | .23         |     |      |
| Total          | 822.97         | 3558 |             |     |      |

Source: The Citizen Panel 26 2017

**Table S8.** Descriptive statistics of year of birth by experiment groups

Year of birth

| Group          | N    | Mean    | Std. dev | Std. err | 95 % CI lower | 95 % CI Upper |
|----------------|------|---------|----------|----------|---------------|---------------|
| 80 % cooperate | 880  | 1963.64 | 14.85    | .50      | 1962.66       | 1964.62       |
| 20 % cooperate | 944  | 1962.95 | 14.75    | .48      | 1962.00       | 1963.89       |
| Information    | 871  | 1963.35 | 14.80    | .50      | 1962.37       | 1964.34       |
| Control        | 886  | 1964.53 | 14.12    | .47      | 1963.60       | 1965.46       |
| Total          | 3581 | 1963.61 | 14.64    | .25      | 1963.13       | 1964.09       |

Source: The Citizen Panel 26 2017

**Table S9.** ANOVA of year of birth by experiment groups

Year of birth

| Group          | Sum of Squares | df   | Mean Square | F    | Sig. |
|----------------|----------------|------|-------------|------|------|
| Between groups | 1220.82        | 3    | 406.94      | 1.90 | .13  |
| Within groups  | 765758.01      | 3577 | 214.08      |      |      |
| Total          | 766978.82      | 3580 |             |      |      |

Source: The Citizen Panel 26 2017

**Table S10.** Descriptive statistics of level of education by experiment groups

Level of education

| <b>Group</b>   | <b>N</b> | <b>Mean</b> | <b>Std. dev</b> | <b>Std. err</b> | <b>95 % CI<br/>lower</b> | <b>95 % CI<br/>Upper</b> |
|----------------|----------|-------------|-----------------|-----------------|--------------------------|--------------------------|
| 80 % cooperate | 886      | 7           | 1.79            | .06             | 6.89                     | 7.12                     |
| 20 % cooperate | 953      | 6.95        | 1.87            | .06             | 6.83                     | 7.07                     |
| Information    | 876      | 6.9         | 1.90            | .06             | 6.78                     | 7.03                     |
| Control        | 889      | 7.02        | 1.81            | .06             | 6.90                     | 7.14                     |
| Total          | 3604     | 6.97        | 1.84            | .03             | 6.91                     | 7.03                     |

Source: The Citizen Panel 26 2017

**Table S11.** ANOVA of level of education by experiment groups

Level of education

| <b>Group</b>   | <b>Sum of<br/>Squares</b> | <b>df</b> | <b>Mean<br/>Square</b> | <b>F</b> | <b>Sig.</b> |
|----------------|---------------------------|-----------|------------------------|----------|-------------|
| Between groups | 7.54                      | 3         | 2.51                   | .74      | .53         |
| Within groups  | 12250.04                  | 3600      | 3.40                   |          |             |
| Total          | 12257.58                  | 3603      |                        |          |             |

Source: The Citizen Panel 26 2017
